# Supplementary material
Source: Royal Society of Chemistry journal article supplement (doi:10.1039/d6sm00195e)
Supplement: d6sm00195e1.pdf [file d6sm00195e1.pdf]

## Supplementary information

Mario Cordova-Gonzalez,<sup>†</sup> Parisa Bazazi,<sup>\*,‡</sup> and S. Hossein Hejazi<sup>\*,†</sup>

<sup>†</sup>*Department of Chemical and Petroleum Engineering, University of Calgary, Calgary, AB  
T2N 1N4, Canada*

<sup>‡</sup>*Department of Petroleum Engineering, Colorado School of Mines, Golden, USA*

E-mail: pbazazi@mines.edu; shhejazi@ucalgary.ca

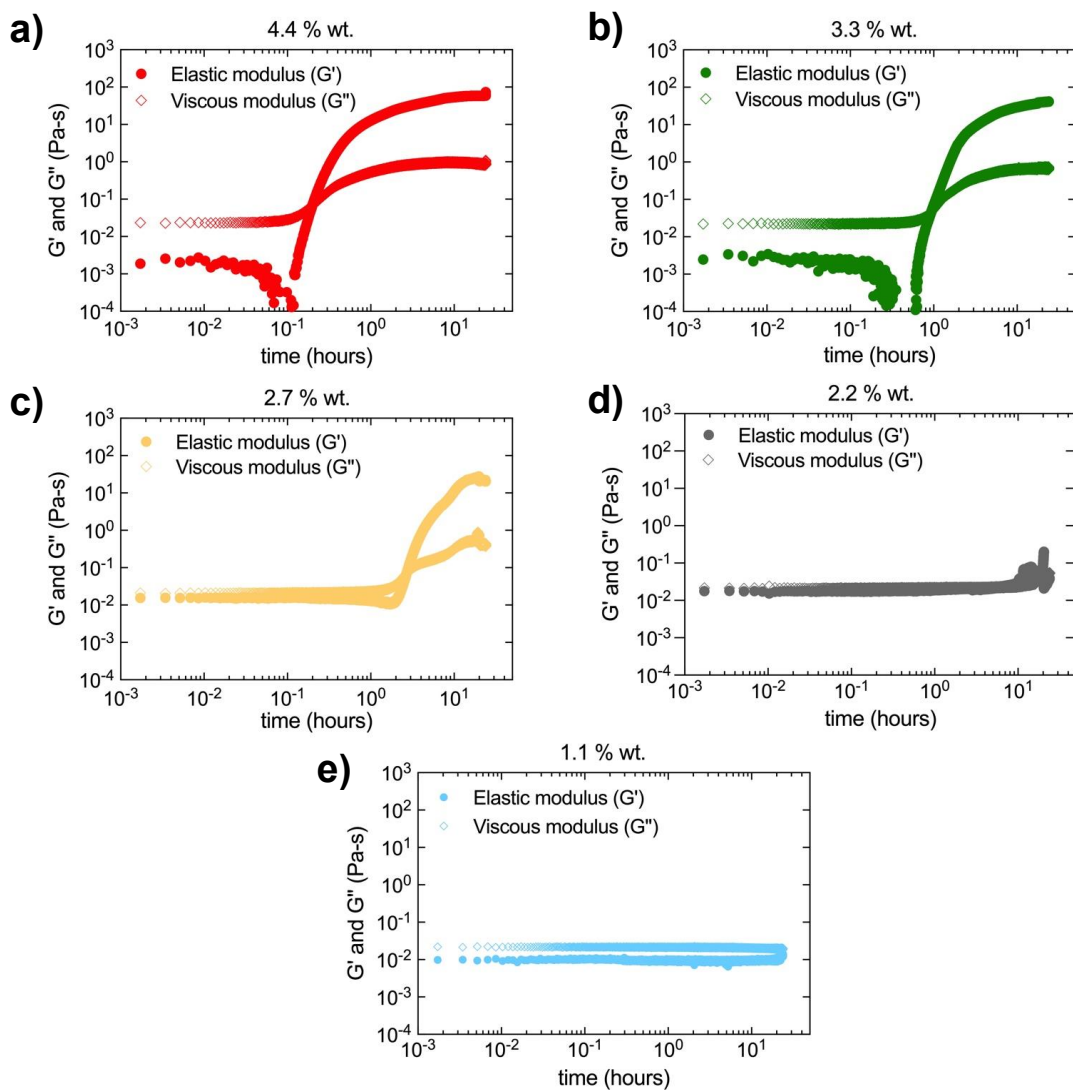

Figure S1: Elastic modulus ( $G'$ , filled circles) and viscous modulus ( $G''$ , open diamonds) plotted as a function of time for samples prepared with 4.4, 3.3, 2.7, 2.2, and 1.1 wt.% reactant concentration, shown from (a) to (e), respectively, as in **Figure 1(c)**. The crossover points between  $G'$  and  $G''$  shift to later times as the reactant concentration decreases. The gel point for the sample used in this study (4.4 wt.%) occurs at 0.16 hours.

Table S1: Early-time apparent contact angles of different droplet types measured at first contact with the substrate during impact ( $t \approx 1$  ms).

| Sample                    | Apparent contact angle ( $^\circ$ ) |
|---------------------------|-------------------------------------|
| Heptane                   | $89.0 \pm 5.1$                      |
| Micellar solution         | $87.5 \pm 9.9$                      |
| Water emulsions, 5% vol.  | $116.4 \pm 16.0$                    |
| Water emulsions, 10% vol. | $120.6 \pm 18.2$                    |
| Water emulsions, 25% vol. | $116.2 \pm 23.8$                    |
| Gel emulsions, 5% vol.    | $114.1 \pm 25.7$                    |
| Gel emulsions, 10% vol.   | $112.2 \pm 8.5$                     |
| Gel emulsions, 25% vol.   | $121.9 \pm 19.9$                    |

Table S2: Density, viscosity (evaluated at  $\dot{\gamma} \approx 280 \text{ s}^{-1}$  and at low shear rate), dimensionless impact numbers ( $We$ ,  $Re$ ,  $Oh$ ), measured spreading factors, and corresponding predictions from empirical and unified scaling laws ( $a_1 \approx 1.24$ ) for all investigated liquids.

| Sample            | $\rho$<br>( $\text{kg m}^{-3}$ ) | $\mu$ @ $280 \text{ s}^{-1}$<br>( $\text{mPa}\cdot\text{s}$ ) | $\mu_0$ @ $0.1 \text{ s}^{-1}$<br>( $\text{mPa}\cdot\text{s}$ ) | $D_{\text{max}}/D_0$ | $We$ | $Re$   | $Oh$    | $We^{1/4}$ | $\frac{Re^{1/5} P^{1/2}}{a_1 + P^{1/2}}$ |
|-------------------|----------------------------------|---------------------------------------------------------------|-----------------------------------------------------------------|----------------------|------|--------|---------|------------|------------------------------------------|
| Heptane           | 684                              | 0.37                                                          | 0.37                                                            | $2.32 \pm 0.01$      | 27.0 | 2440.2 | 0.00213 | 2.28       | 2.23                                     |
| Micellar solution | 701                              | 0.46                                                          | 0.46                                                            | $2.29 \pm 0.03$      | 33.3 | 1965.8 | 0.00293 | 2.40       | 2.30                                     |
| Water 5% vol.     | 710                              | 0.79                                                          | 1.25                                                            | $2.17 \pm 0.01$      | 34.4 | 1159.4 | 0.00505 | 2.42       | 2.20                                     |
| Water 10% vol.    | 724                              | 1.07                                                          | 4.78                                                            | $2.16 \pm 0.02$      | 35.0 | 872.9  | 0.00678 | 2.43       | 2.14                                     |
| Water 25% vol.    | 758                              | 2.60                                                          | 9.57                                                            | $1.94 \pm 0.01$      | 36.7 | 376.1  | 0.01610 | 2.46       | 1.96                                     |
| Gel 5% vol.       | 714                              | 0.86                                                          | 6.50                                                            | $2.17 \pm 0.06$      | 34.5 | 1071.0 | 0.00549 | 2.42       | 2.18                                     |
| Gel 10% vol.      | 720                              | 1.13                                                          | 33.88                                                           | $1.96 \pm 0.12$      | 34.8 | 821.9  | 0.00718 | 2.43       | 2.12                                     |
| Gel 25% vol.      | 750                              | 2.52                                                          | 88.23                                                           | $1.80 \pm 0.16$      | 36.2 | 383.9  | 0.01569 | 2.45       | 1.96                                     |

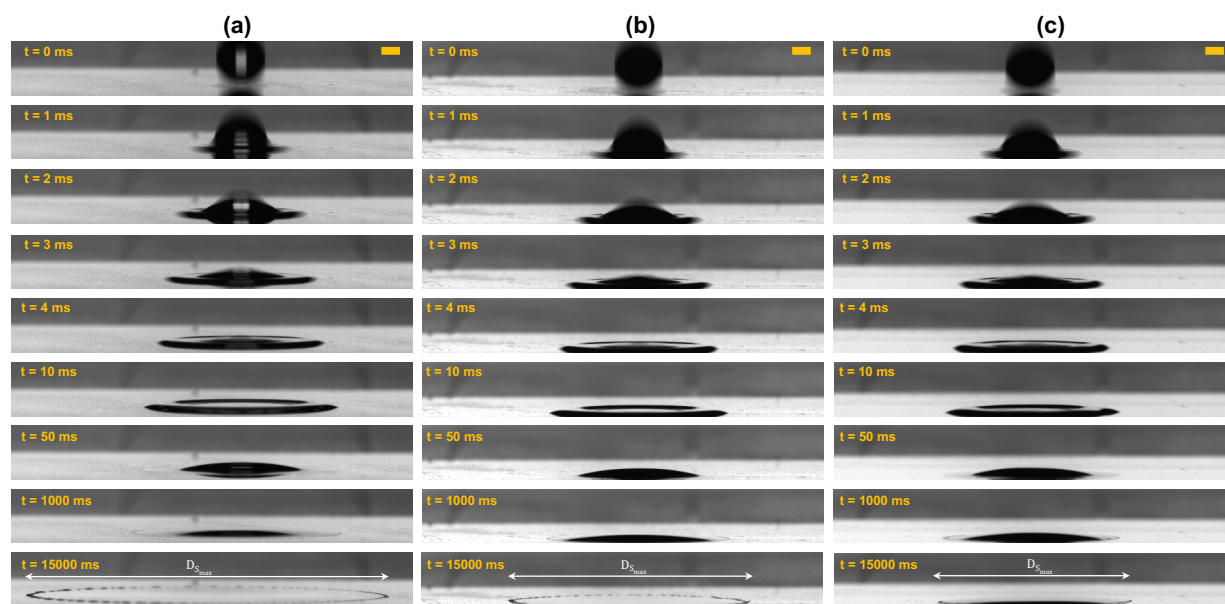

Figure S2: Impact and spreading of (a) a micellar solution drop, (b) a water-emulsion drop, and (c) a gel-emulsion drop at 10 vol.% aqueous phase. The injected volume for drop detachment is  $5.2 \mu\text{L}$  for all cases. The maximum spreading diameter,  $D_{S_{\text{max}}}$ , decreases for gel emulsions. The scale bar represents  $750 \mu\text{m}$ .

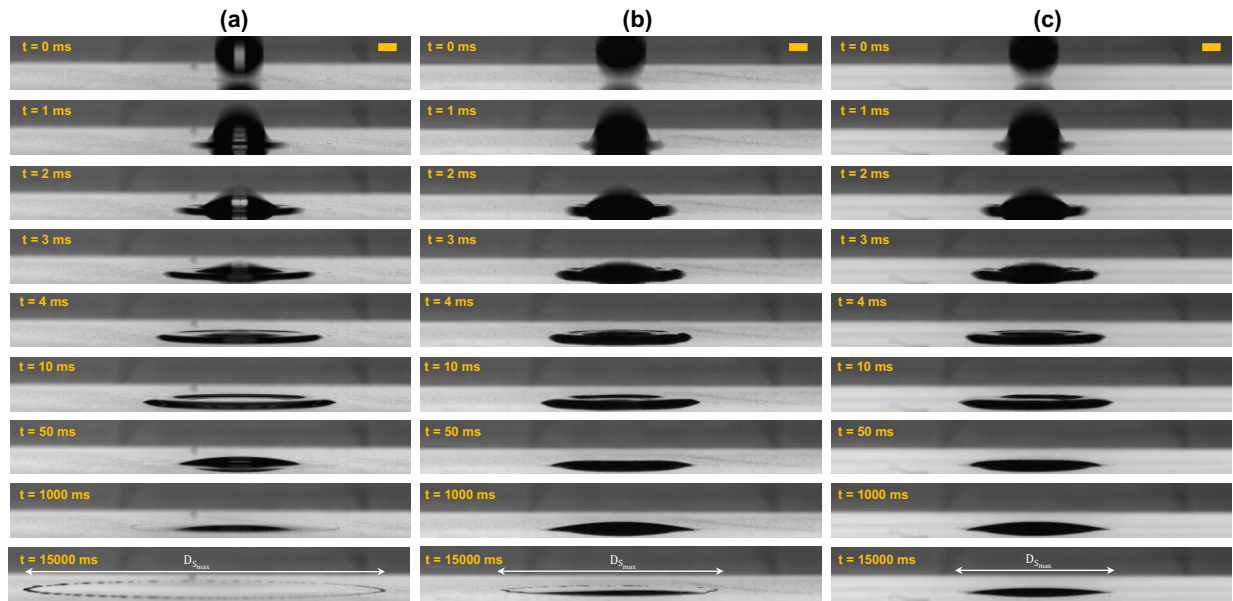

Figure S3: Impact and spreading of (a) a micellar solution drop, (b) a water-emulsion drop, and (c) a gel-emulsion drop at 25 vol.% aqueous phase. The injected volume for drop detachment is  $5.2 \mu\text{L}$  for all cases. The maximum spreading diameter,  $D_{S,\text{max}}$ , decreases for gel emulsions. The scale bar represents  $750 \mu\text{m}$ .

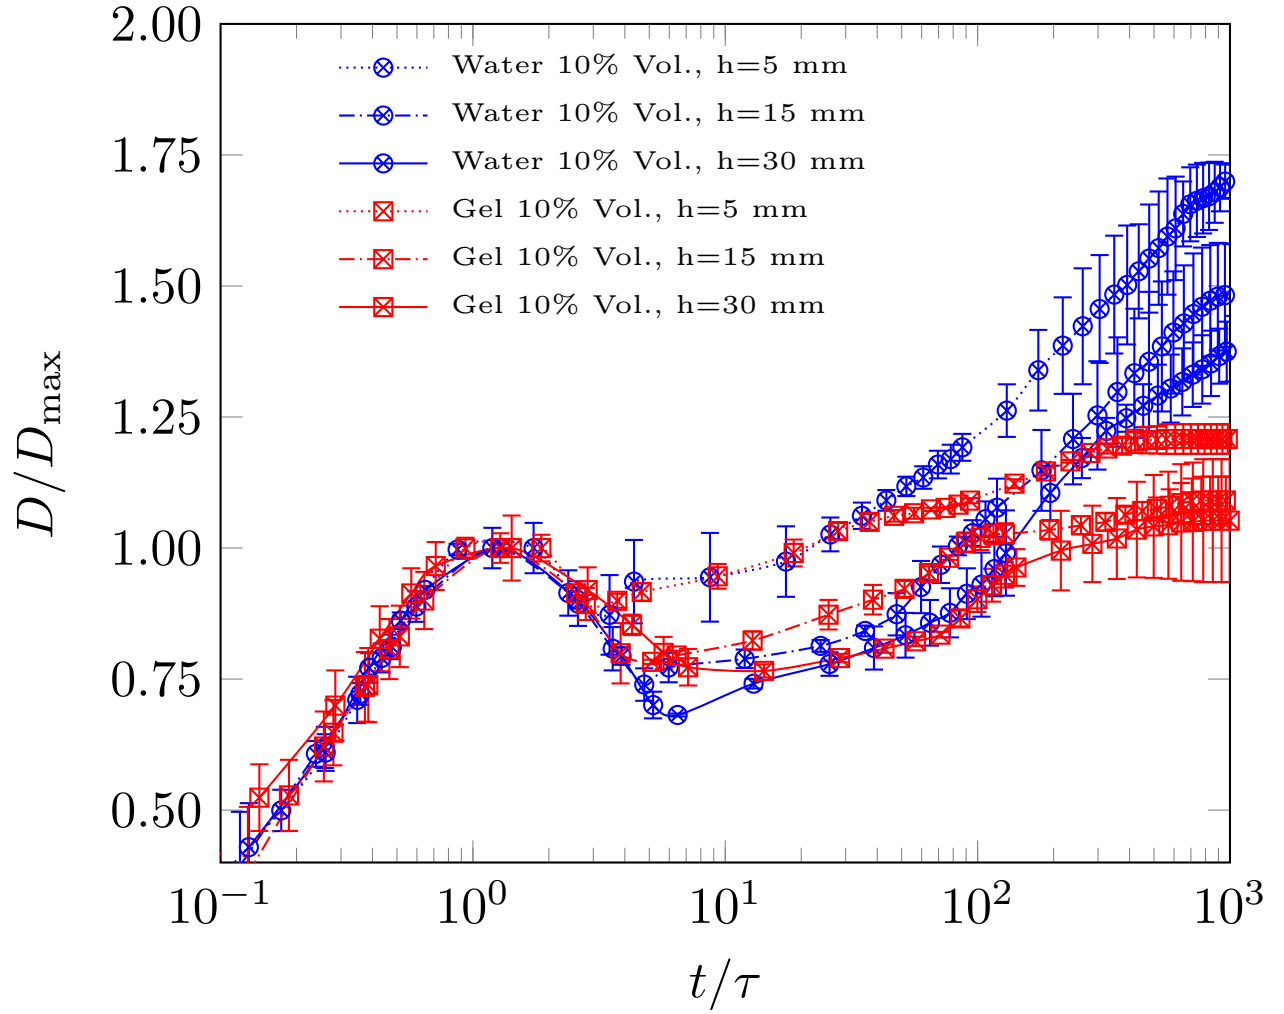

Figure S4: Normalized spreading diameter  $D/D_{\max}$  versus dimensionless time  $t/\tau$  for water and gel emulsions at 10 vol.% internal phase concentration, impacted from heights of  $h = 5, 15,$  and  $30$  mm.
