# Supplementary material
Source: Royal Society of Chemistry journal article supplement (doi:10.1039/d6sm00195e)

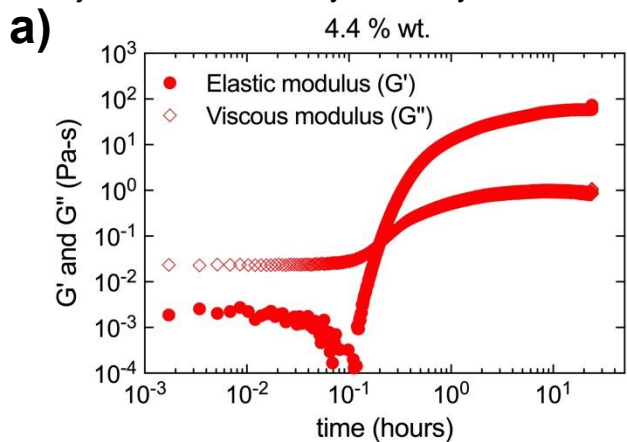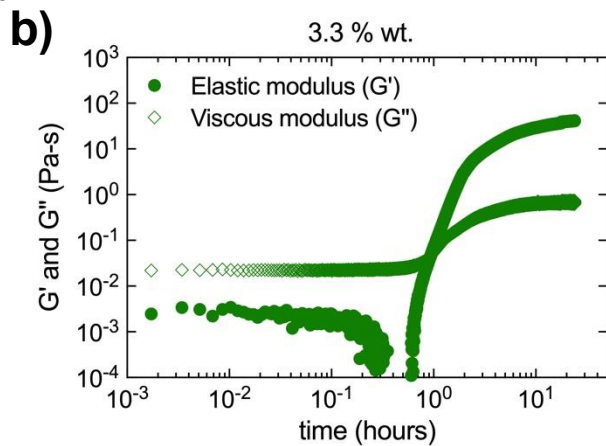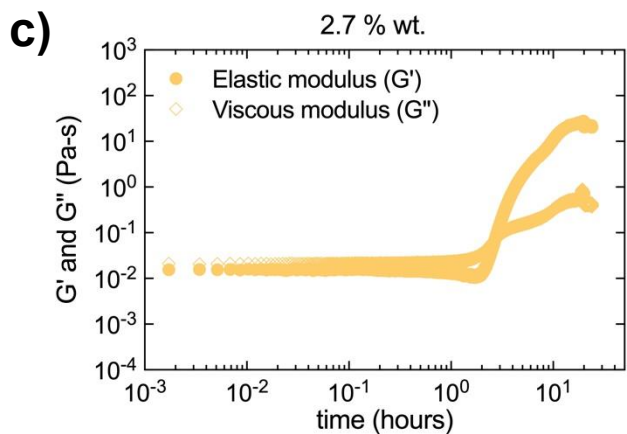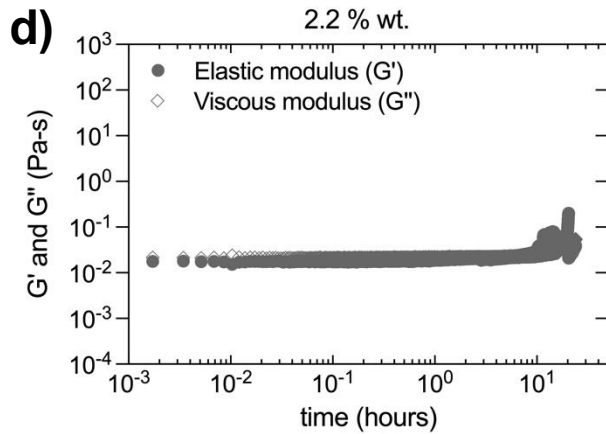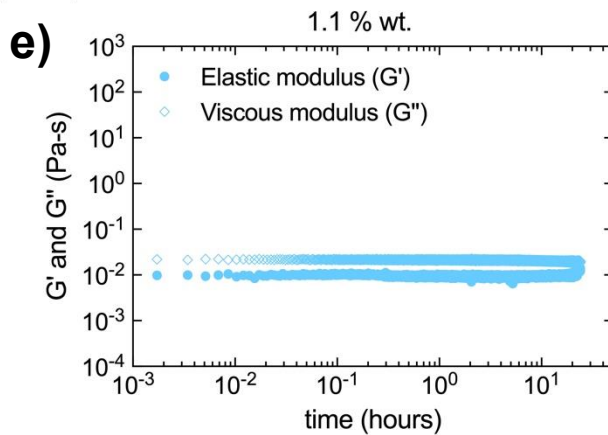

Supplement: d6sm00195e2.pdf [file d6sm00195e2.pdf]

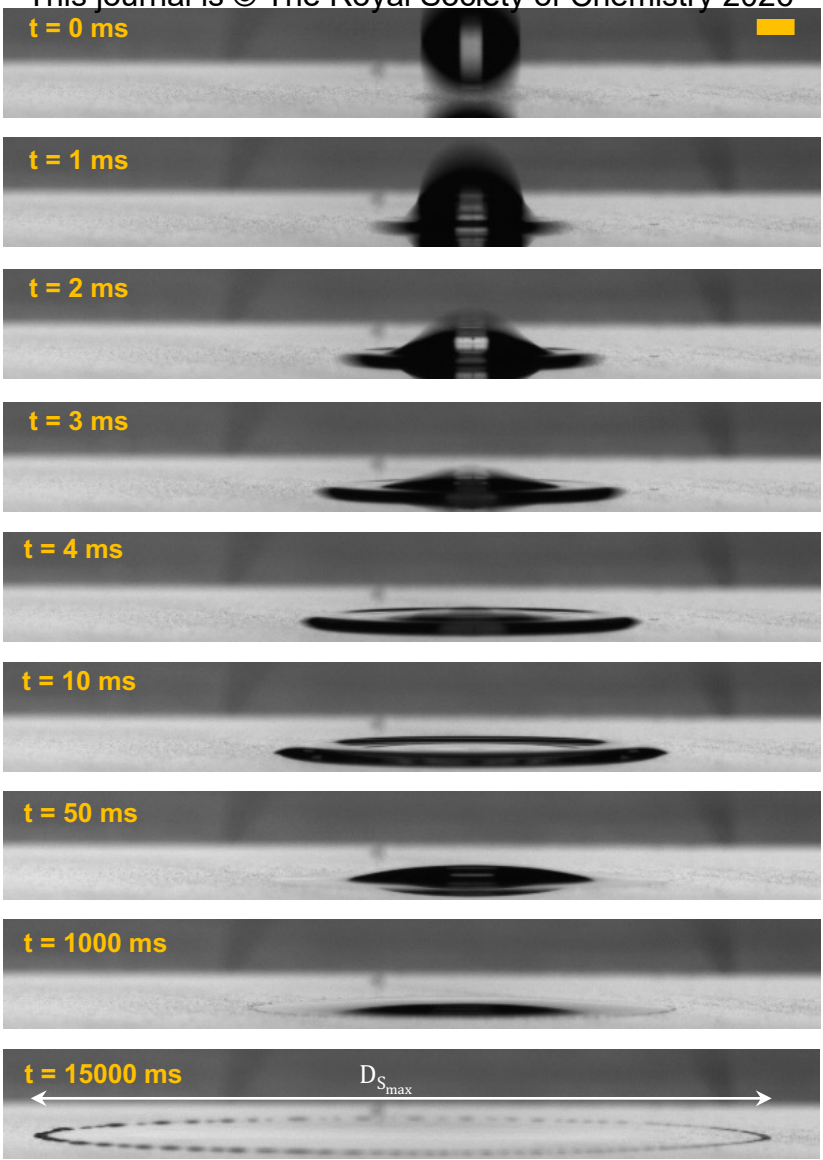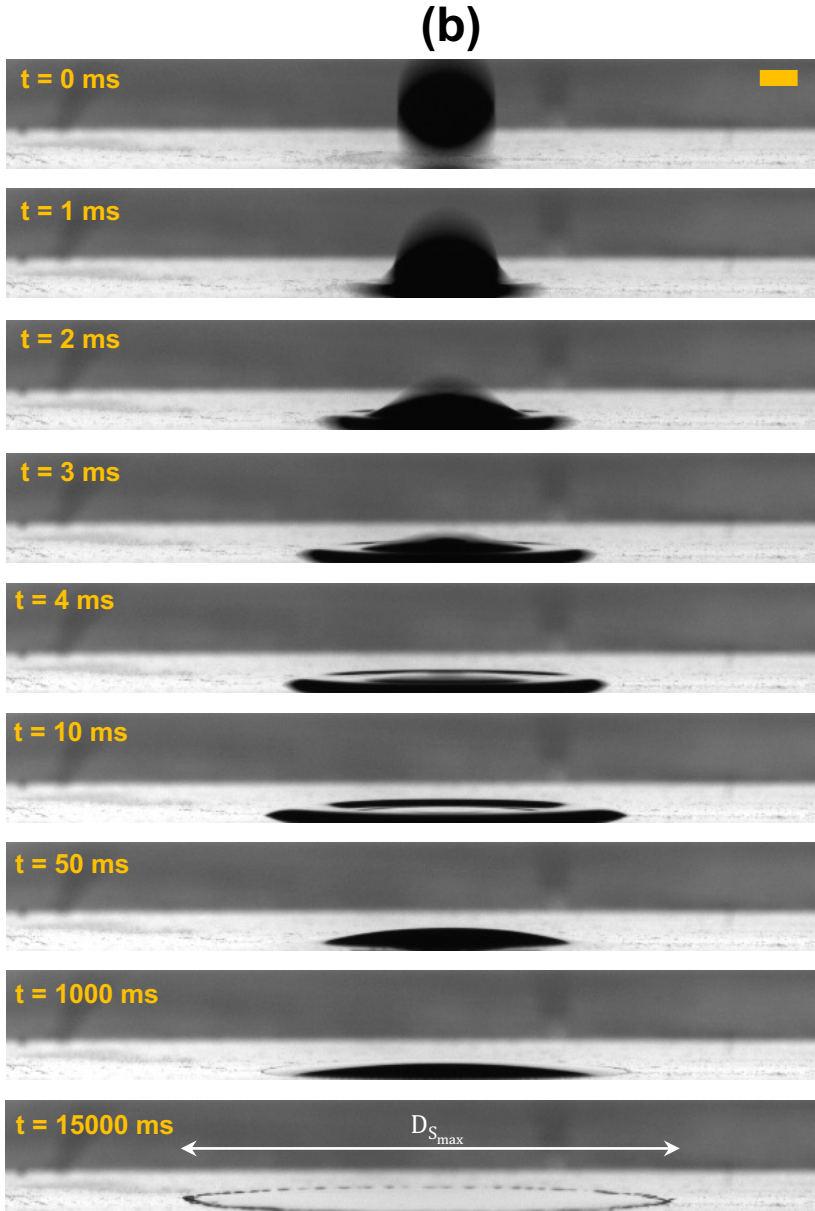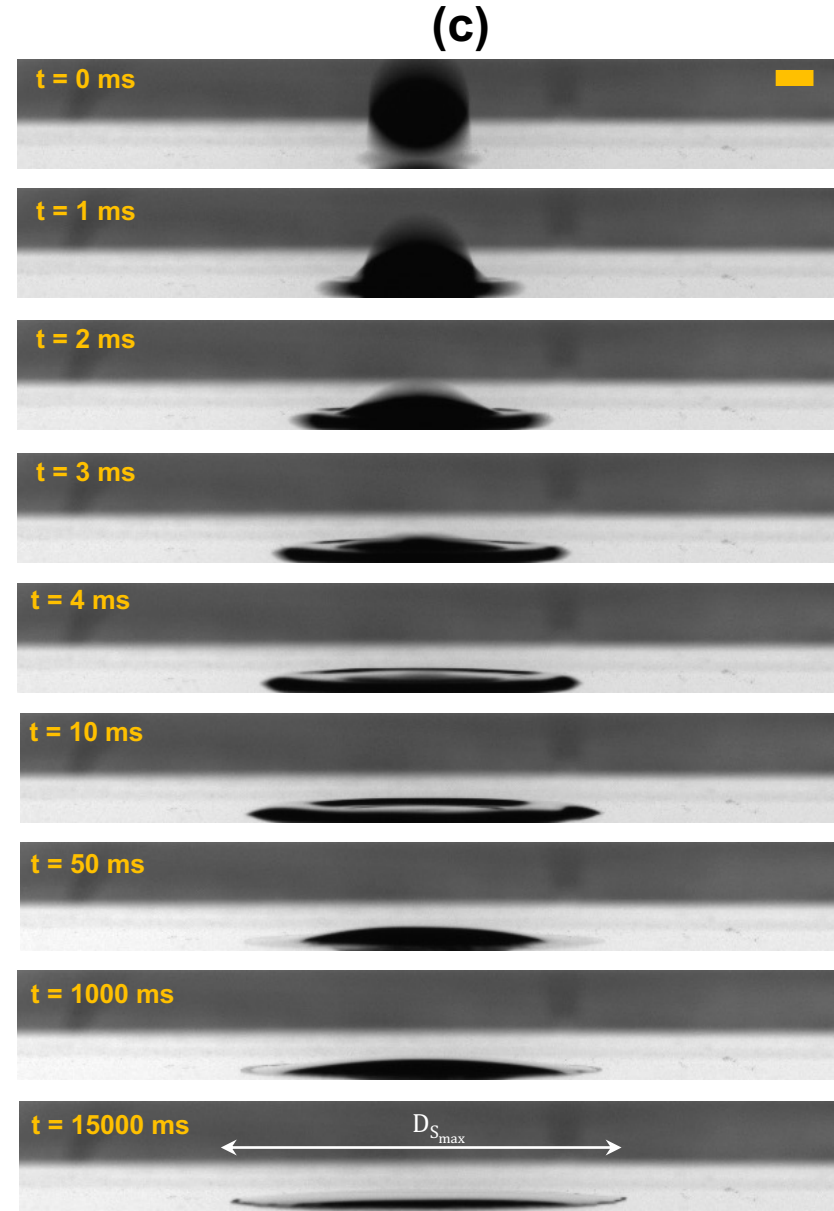

Supplement: d6sm00195e3.pdf [file d6sm00195e3.pdf]

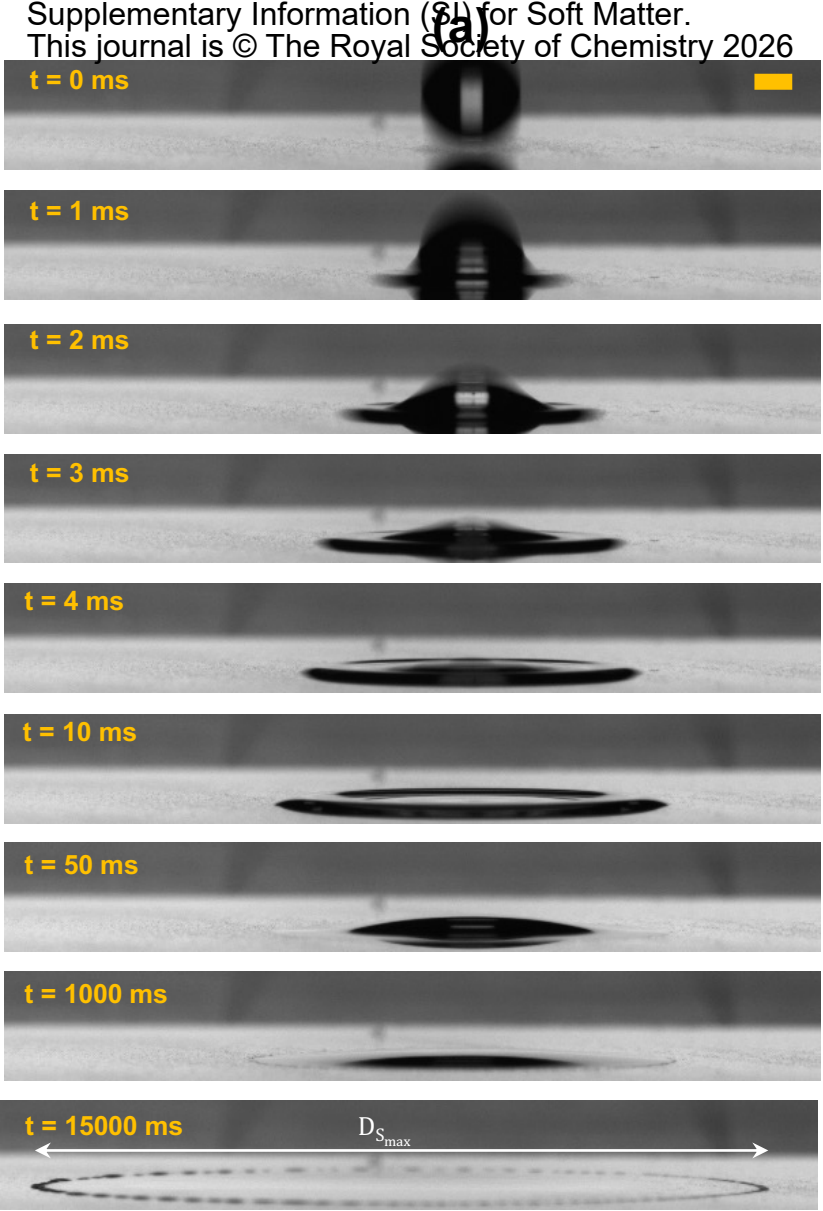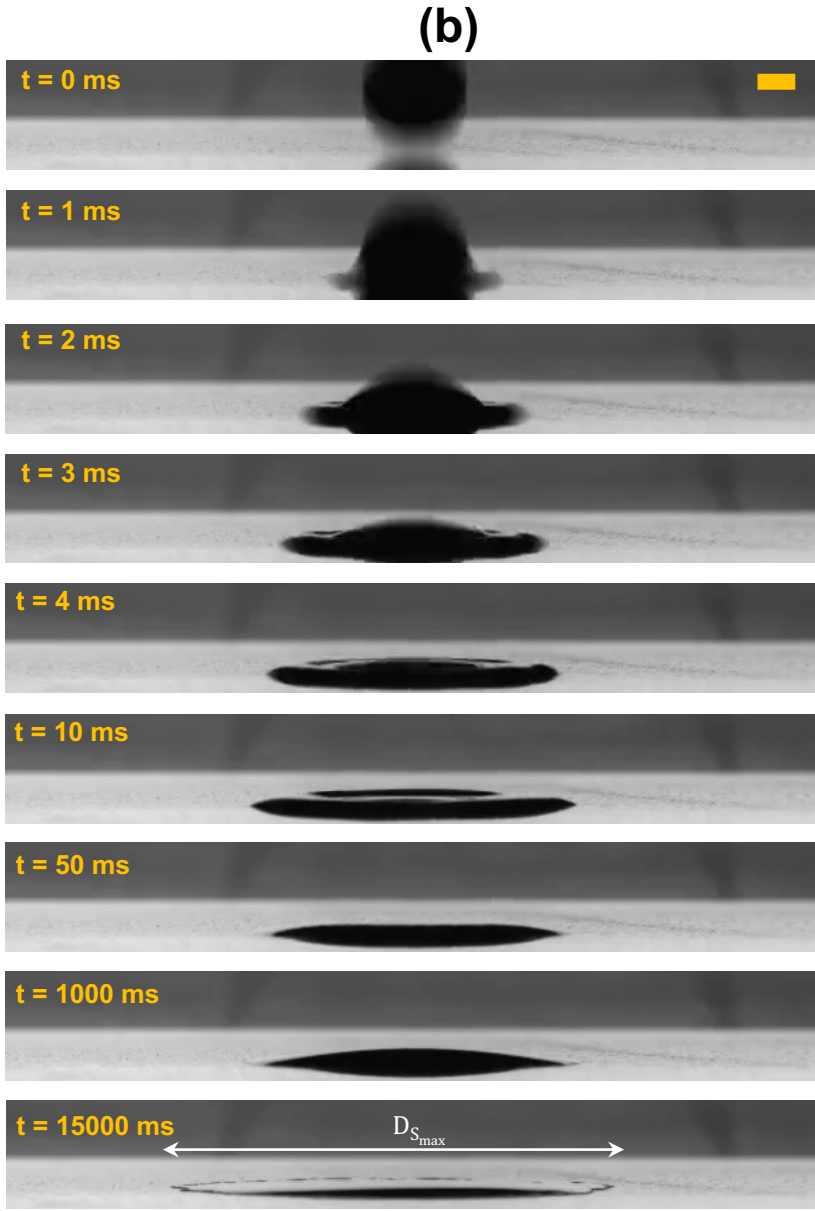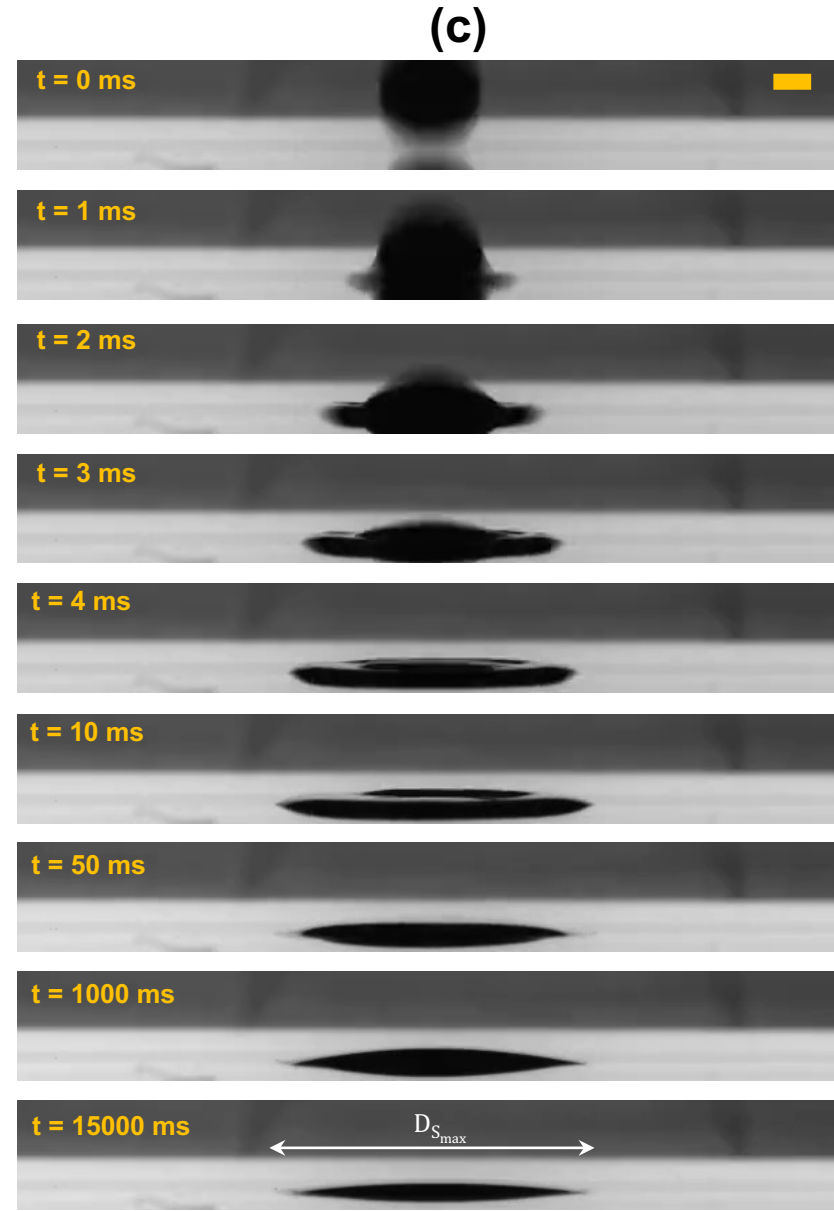

Supplement: d6sm00195e4.pdf [file d6sm00195e4.pdf]

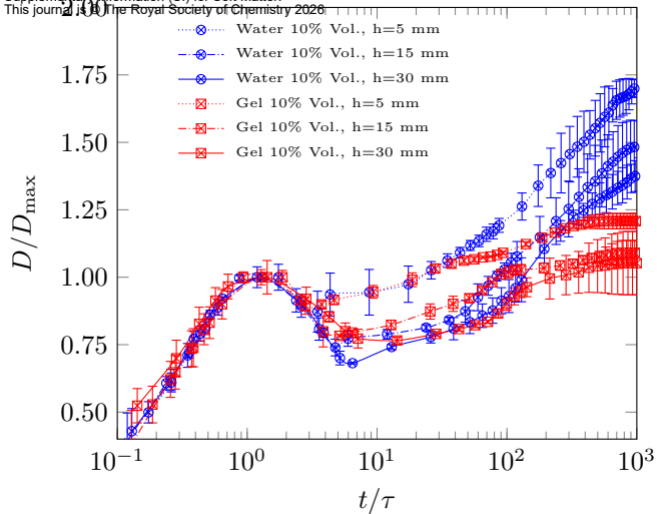

Supplement: d6sm00195e5.pdf [file d6sm00195e5.pdf]
